# Supplementary material for: Investigation of D1 Receptor–Agonist Interactions and D1/D2 Agonist Selectivity Using a Combination of Pharmacophore and Receptor Homology Modeling
Source: PubMed Central journal article supplement (PMC3382191; doi:10.1002/cmdc.201100546), 2012-02-07
Supplement: cmdc0007-0483-SD1.pdf [file cmdc0007-0483-SD1.pdf]

## Supporting Information

© Copyright Wiley-VCH Verlag GmbH & Co. KGaA, 69451 Weinheim, 2012

### **Investigation of D<sub>1</sub> Receptor–Agonist Interactions and D<sub>1</sub>/ D<sub>2</sub> Agonist Selectivity Using a Combination of Pharmacophore and Receptor Homology Modeling**

Marcus Malo,<sup>[b]</sup> Lars Brive,<sup>[c]</sup> Kristina Luthman,<sup>[b]</sup> and Peder Svensson<sup>\*[a]</sup>

cmdc\_201100546\_sm\_miscellaneous\_information.pdf

## Supporting Information

CLUSTAL 2.0.11 multiple sequence alignment

```
drd1_human      -MRTLNTSAMDG-----TGLVVERDFSVRILTACFLSLLILSTLLGNTLVCAAV 48
drd2_human      -MDPLNLSWYDDDLERQNWSRPFNGSDGKADRPHYNYATLLTLLIAVIVFGNVLVCMVA 59
adrb2_human     MGQPGNGSAFLLAPNRS--HAPDHDVTDQQRDEVWVVGMGIVMSLIVLAIVFGNVLVITAI 58
                . * *                . : *                . .::*: : :*:** *:

drd1_human      IRFRHLRSKVTNFFVISLAVSDLLVAVLVMPWKAVAEIAGFWPFG-SFCNIWVAFDIMCS 107
drd2_human      SREKALQT-TTNYLIVSLAVADLLVATLVMPWVYVLEVVGWKFVSRHCDIFVTLDVMMC 118
adrb2_human     AKFERLQT-VTNYFITSLACADLVMPVGFAGAHILMKMWTFGNFWCEFVTSIDVLCV 117
                : . *:: .**::: *** :*::: . *::: . * * . *:::***:

drd1_human      TASILNLCVISVDRYWAISSPFRYERKMPK-AAFILISVAVTSLVLSIFIPVQLSWHKA 166
drd2_human      TASILNLCAISIDRYTAVAMPMLYNTRYSSKRRVTVMISIVWVLSFTIS-CPLLFGLNNA 177
adrb2_human     TASIETLCVIAVDRYFAITSPFKYQSLTGN-KARVILMVWIVSGLTSFLPIQMHWYRA 176
                **** .**.*::** *:: *: *: : : . :*: :.* :* * *:: : .*

drd1_human      KPTSPSDGNATSLAETIDNCDSSLSRTYAISSSVISFYIPVAIMIVTYTRIRIAQKQIR 226
drd2_human      -----DQNECIIAN-----PAFVVYSSIVSFYVPIVTLVYIKIYIVLRRRR- 220
adrb2_human     T-----HQEAICYANETCCDFFTNQAYAIASSIVSFYVPLVIMVYVSRVQEAQRQLQ 231
                . :                ::: **::***:*. : :..* ::: :::

drd1_human      RIAALERA AVHAKNCQTTTGNGKPV ECSQP ESSF KMSFKRETKVLKTL SVIMGVFVCCWL 286
drd2_human      -----SQQKEKKATQMLAIVLGVFIICWL 235
adrb2_human     KIDKSEGRFHVQNLSQVEQDGRG----HGLRRSSKFCLEKHKALKTLGIIMGTFTLCWL 287
                :* *. : *:::*. * **

drd1_human      PFFILNCILPFCGSGETQPF CIDSNTFDV FVWFGWANSSLNPIIY-AFNADFRKAFSTLL 345
drd2_human      PFFITHILNIHDCN-----IPPVLYSAFTWLG VVNSAVNPIIYTTFNIEFRKAFKIL 289
adrb2_human     PFFIVNIVHVIQDNL-----IRKEVYILLNWIGYVNSGFNPLIY-CRSPDFRIAFQELL 340
                **** : : . * : : *::**..**:* * . :** ** :*

drd1_human      GCYRLCPATNNAIETVSI NNNGAAMFSSHHEPRGSIK ECNLVYLIPHAVGSS EDLKKEE 405
drd2_human      HC----- 291
adrb2_human     CLRSSLKAYG--NGYSSNGNTGEQSGYHVEQEKENKLLCEDLPGTEDFVGHQGTVPSDN 398

drd1_human      AAGIARPLEKLSPALSVILDYD TDVSLEKIQPITQNGQHPT 446
drd2_human      -----
adrb2_human     IDSQGRNCSTNDSLL----- 413
```

Figure 1. The initial multiple sequence alignment between dopamine D<sub>1</sub> (drd1), D<sub>2</sub> (drd2) and the adrenergic  $\beta_2$  receptors obtained from ClustalW.

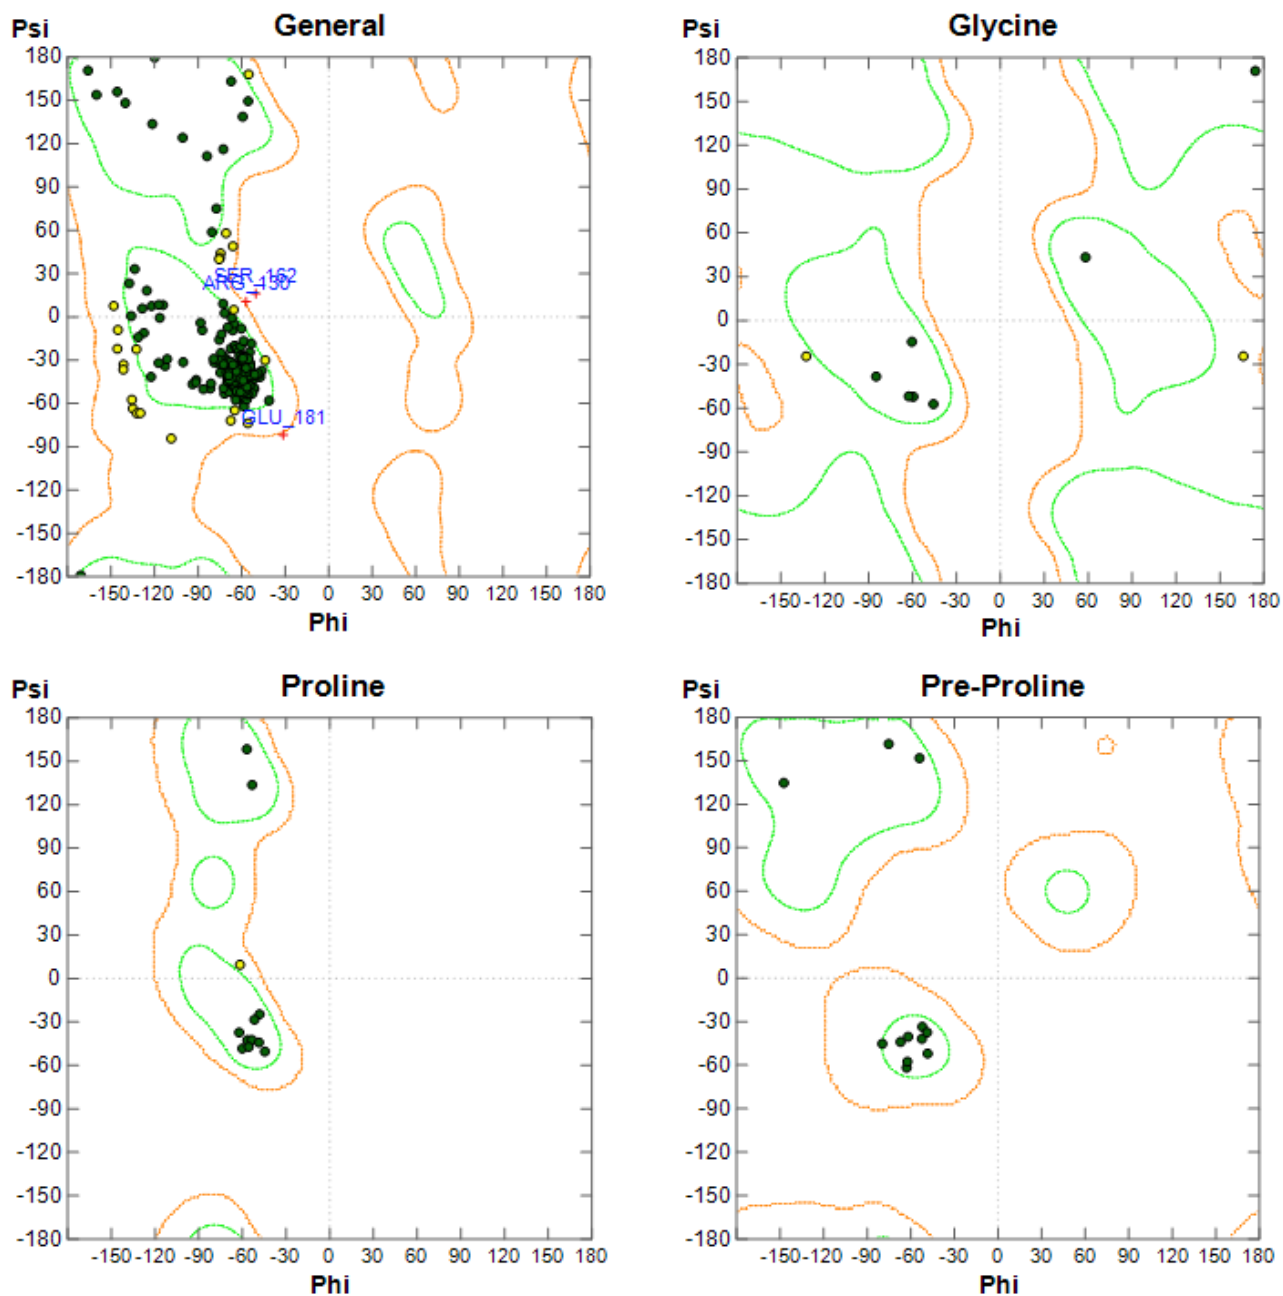

Figure 2. Ramachandran plots for glycines, prolines, pre-prolines and for general residues of the selected dopamine D<sub>1</sub> homology model. The contours indicate allowed (orange) and core (green) regions of  $\phi$  and  $\Psi$  angles, and the filled green rings indicate amino acids within the core regions. The yellow rings indicate allowed regions. A red cross indicates outliers. The outliers Arg150, Ser162 and Glu181 are located in loops far apart from the binding site and are, therefore, considered to be acceptable.

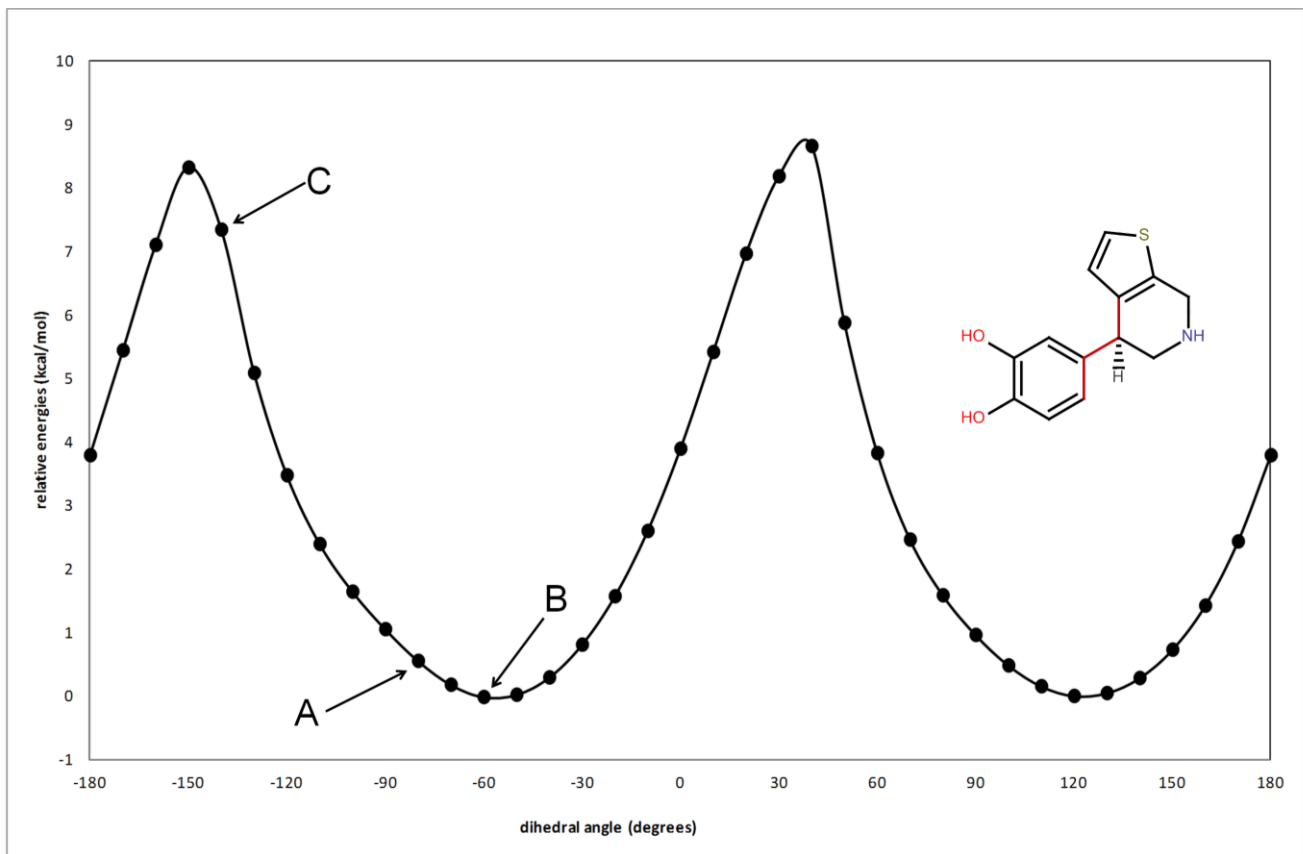

Figure 3. The dihedral angle energy profile for the bond connecting the two ring systems in SKF89626. The dihedral angle in the ligand is marked in red. A) The conformation of SKF89626 in the ligand/receptor complex with a relative energy of  $-0.6$  kcal. B) The global minimum. C) The conformer of SKF89626 just after the planarity flip.

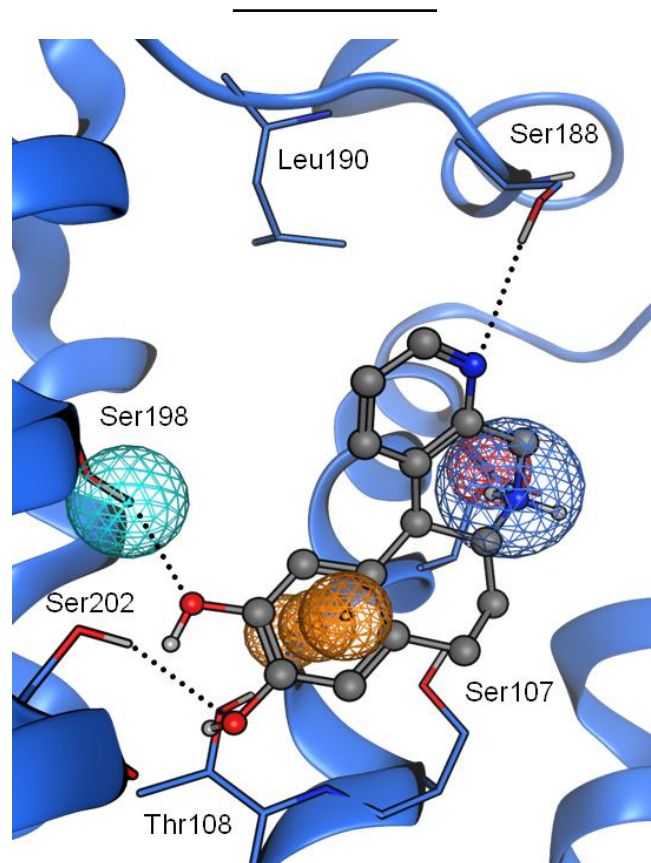

Figure 4. The DHX aza-analogue 1 forms a hydrogen bond with Ser188 in EC2 in the D<sub>1</sub> receptor model. The distance between the heavy atoms in the hydrogen bond is 4.3 Å and the angle (N---H-O(Ser188)) is 139°.
